# Supplementary figures and images for: Spatial correlation of desorption events accelerates water exchange dynamics at Pt/water interfaces
Source: Royal Society of Chemistry journal article supplement (doi:10.1039/d4sc06967f), 2024-12-23

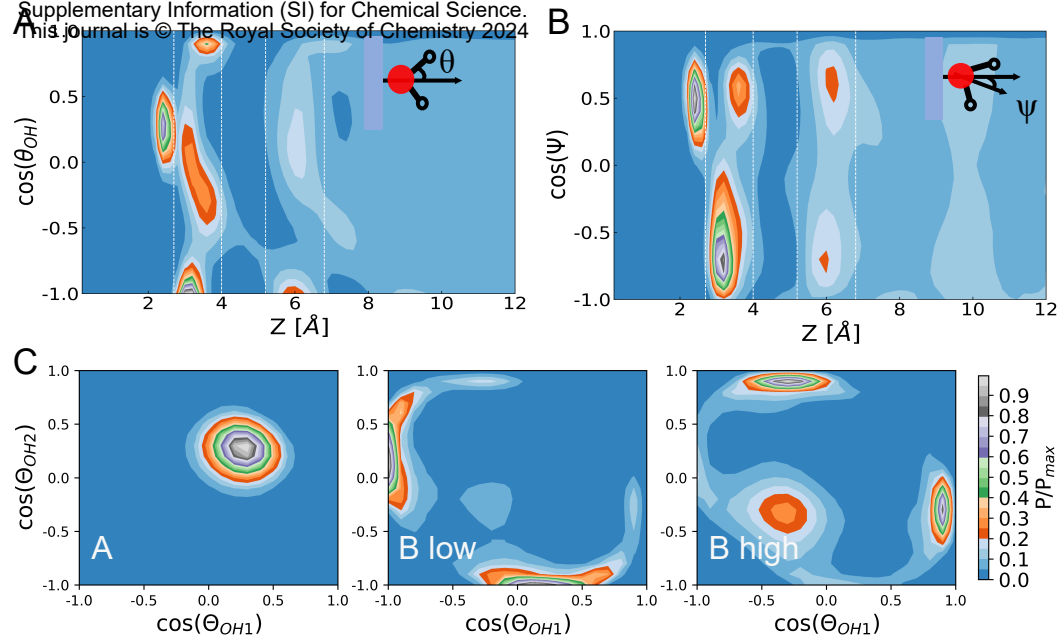

Supplement: d4sc06967f1.pdf [file d4sc06967f1.pdf]

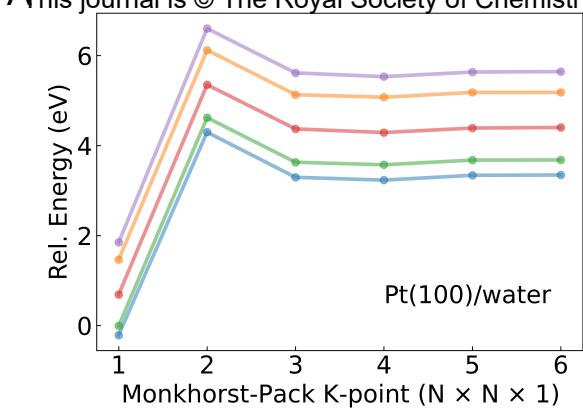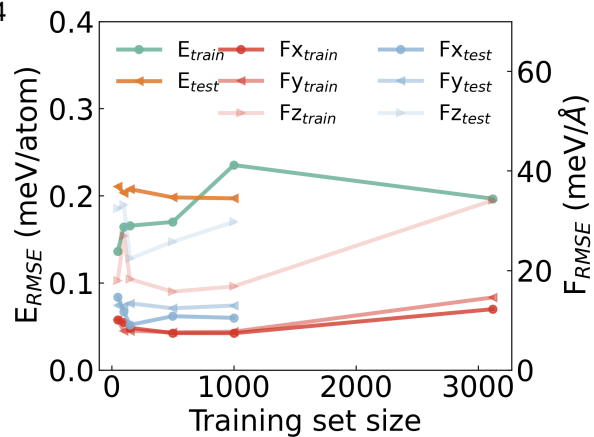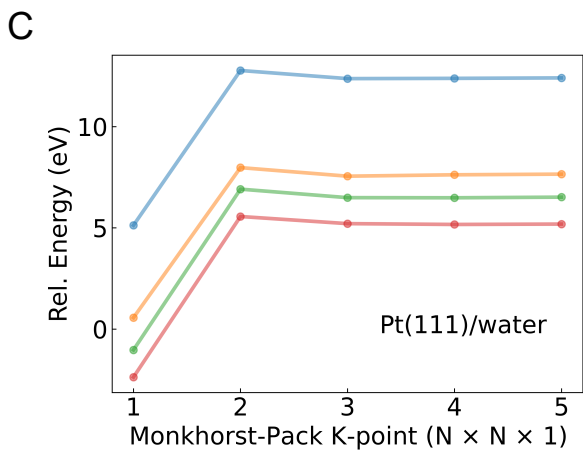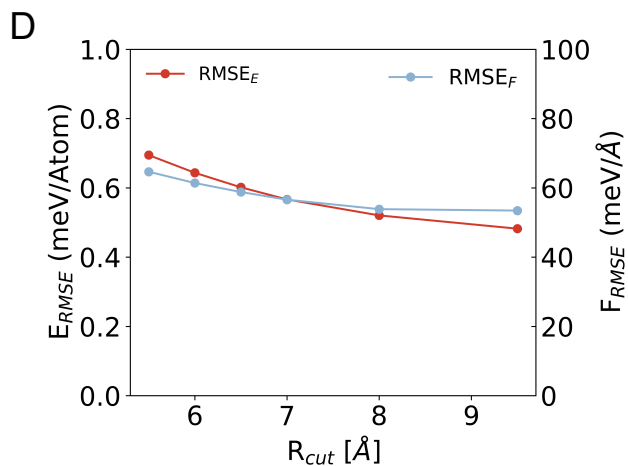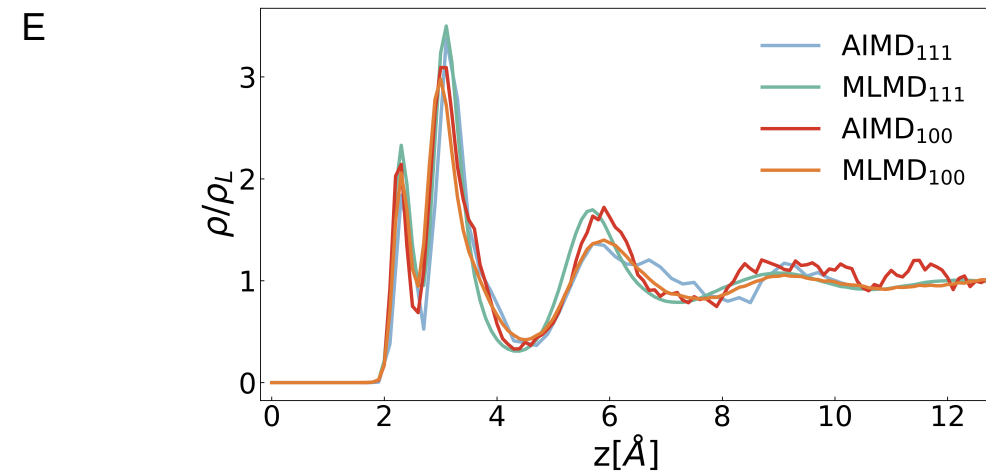

Supplement: d4sc06967f10.pdf [file d4sc06967f10.pdf]

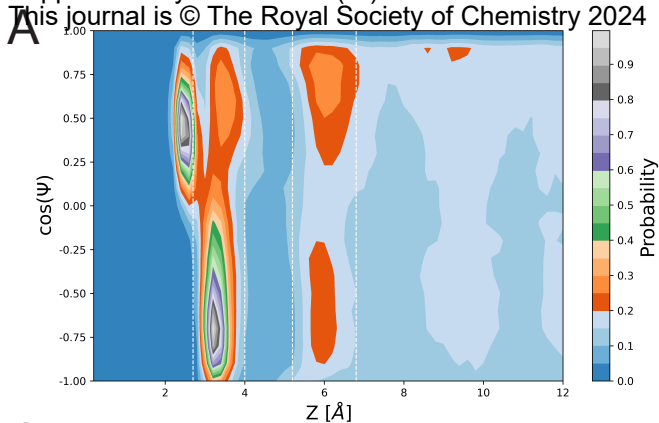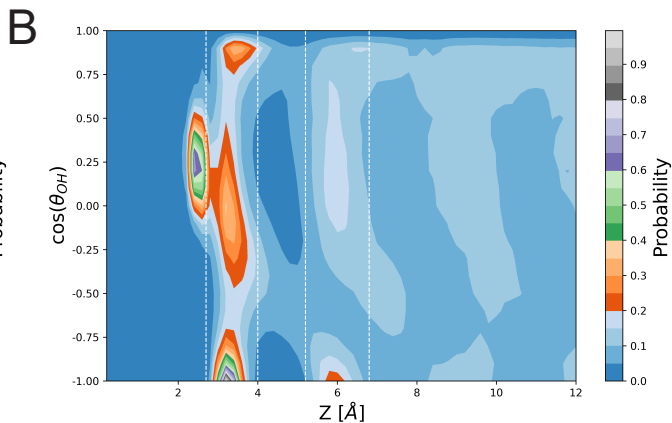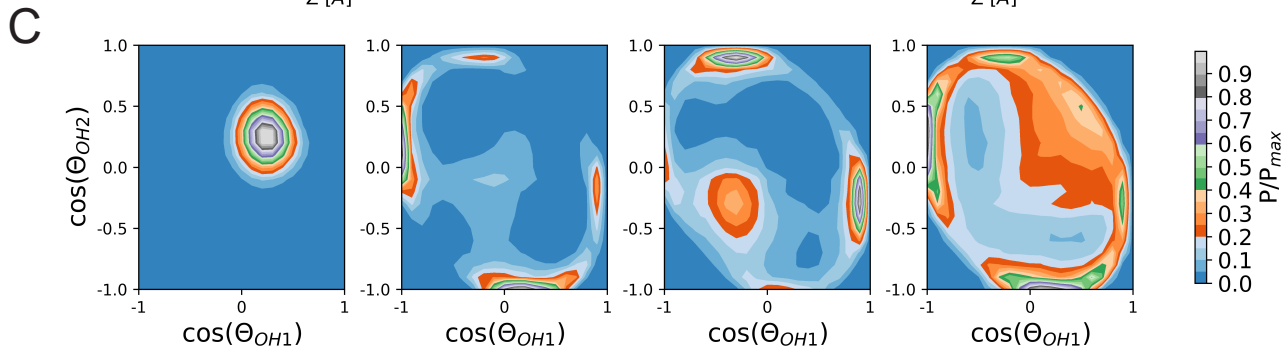

Supplement: d4sc06967f12.pdf [file d4sc06967f12.pdf]

B

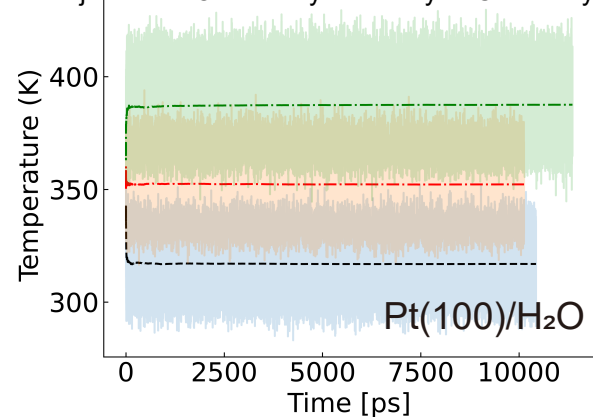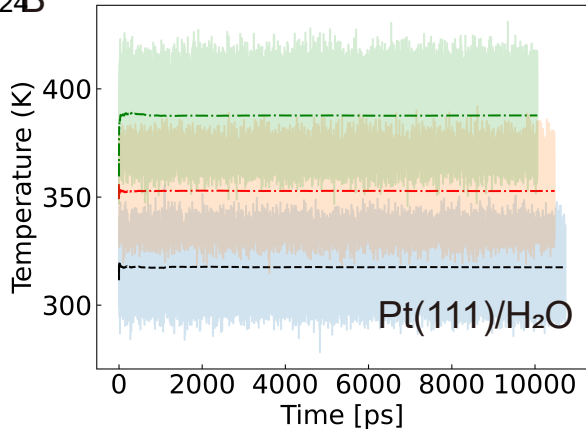

Supplement: d4sc06967f13.pdf [file d4sc06967f13.pdf]

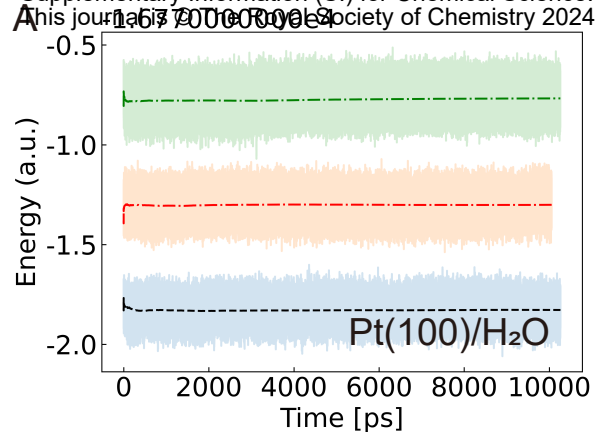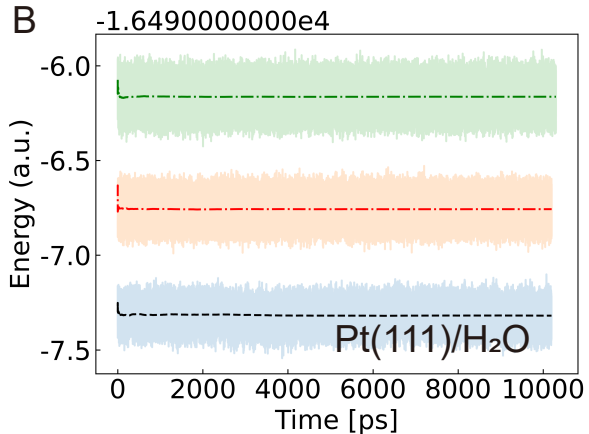

Supplement: d4sc06967f14.pdf [file d4sc06967f14.pdf]

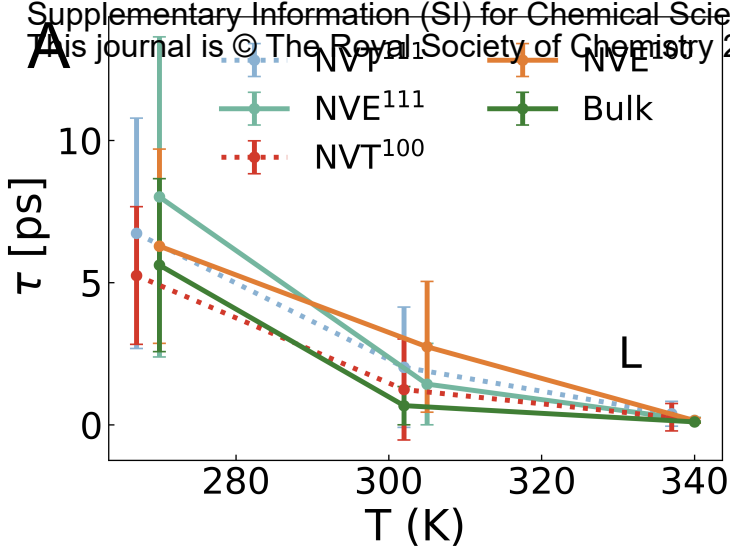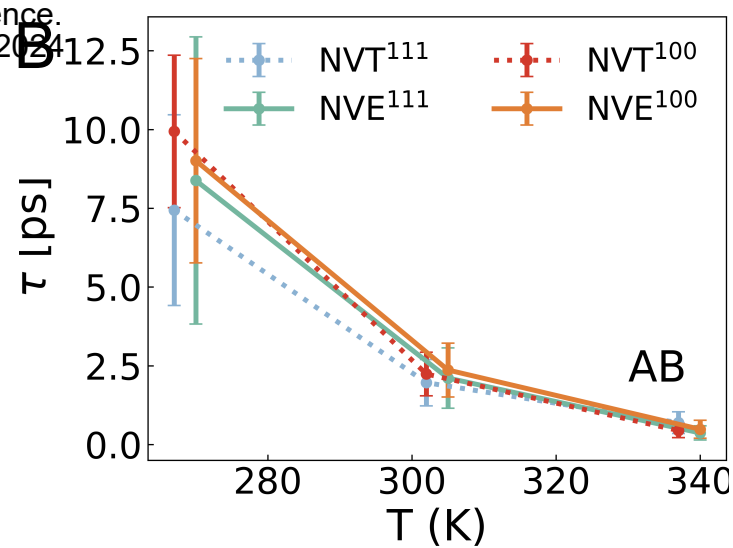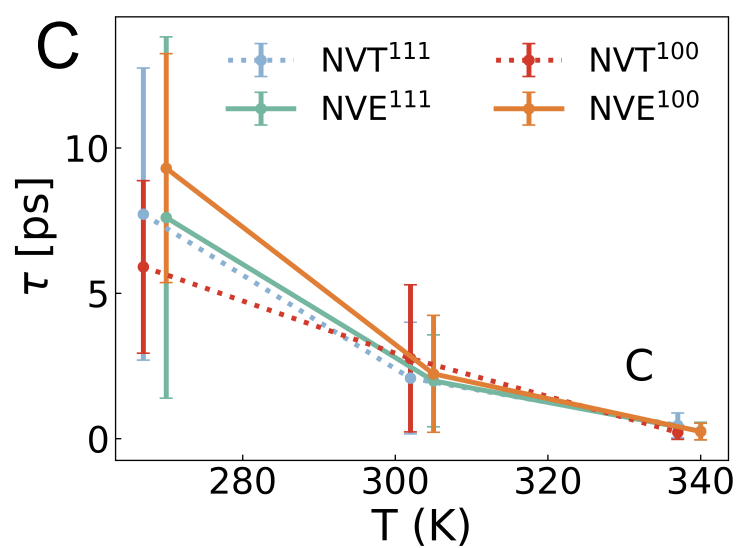

Supplement: d4sc06967f15.pdf [file d4sc06967f15.pdf]

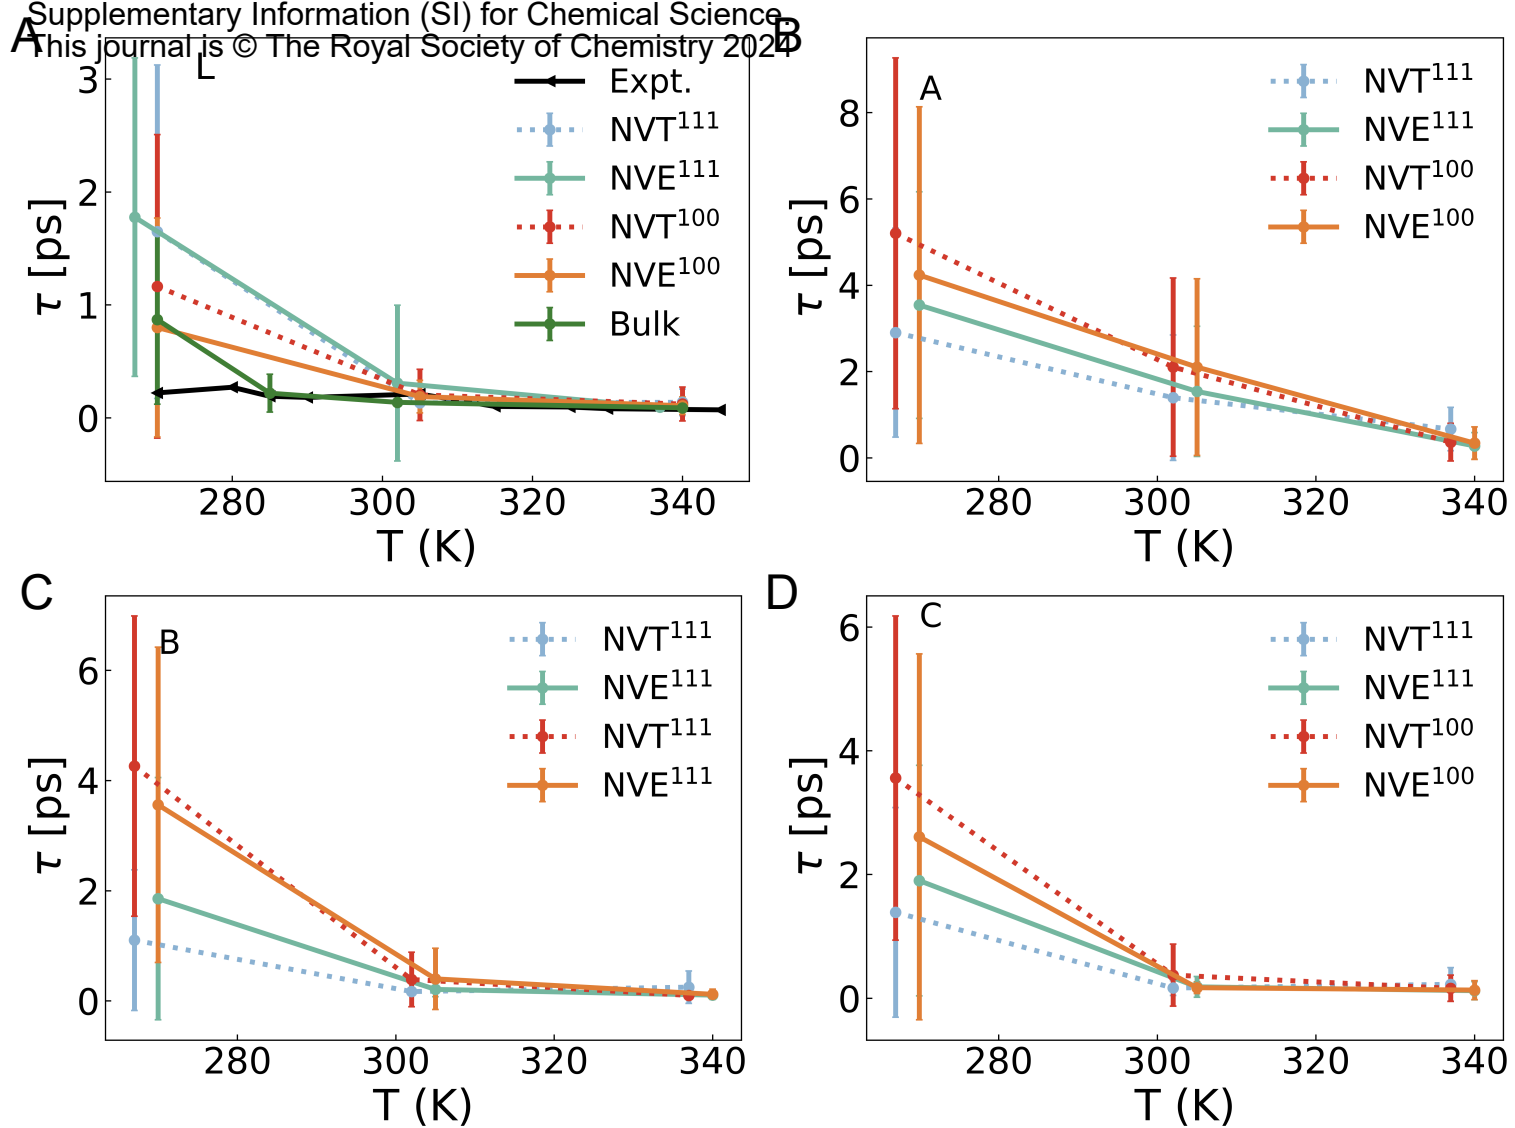

Supplement: d4sc06967f17.pdf [file d4sc06967f17.pdf]

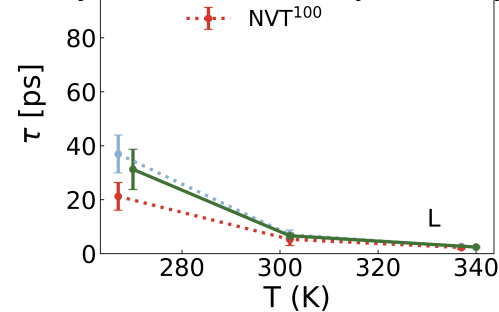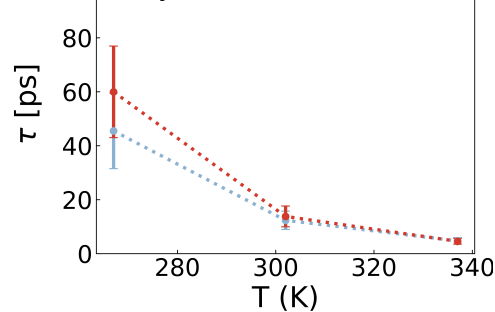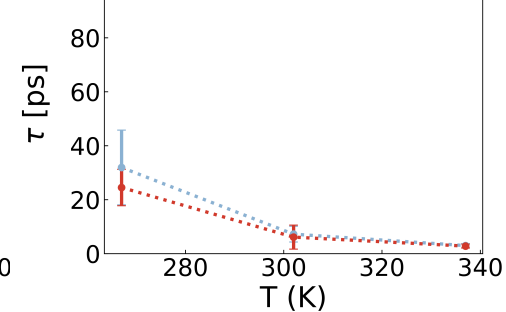

Supplement: d4sc06967f3.pdf [file d4sc06967f3.pdf]

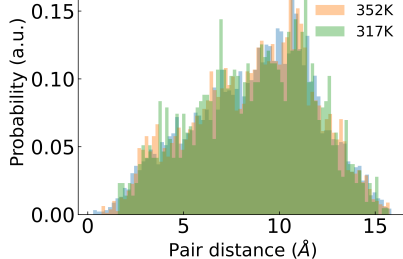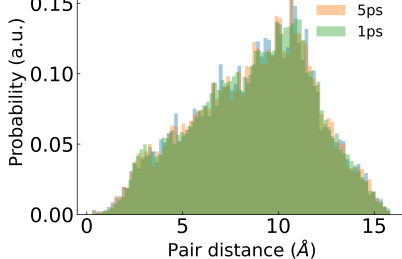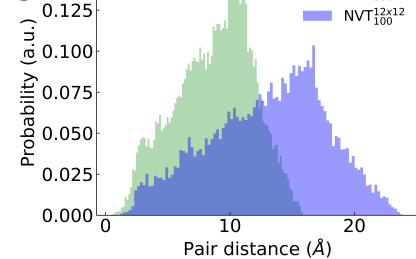

Supplement: d4sc06967f6.pdf [file d4sc06967f6.pdf]

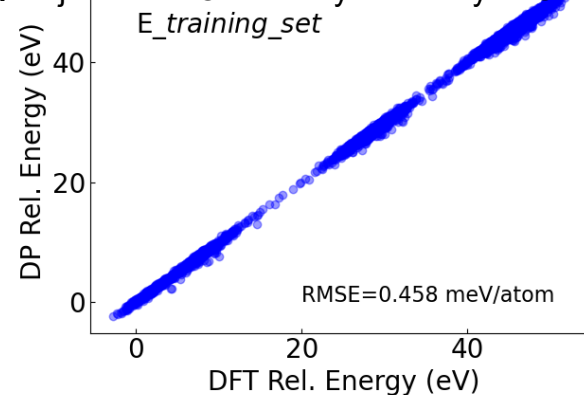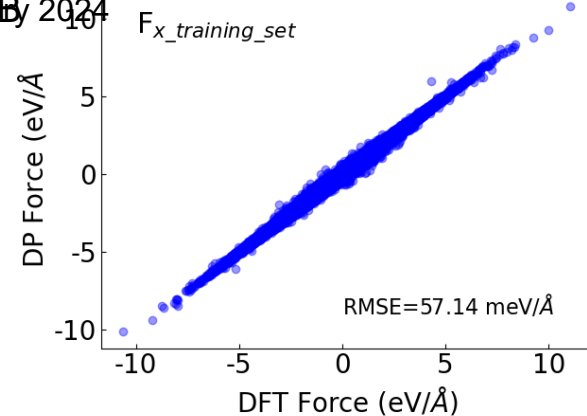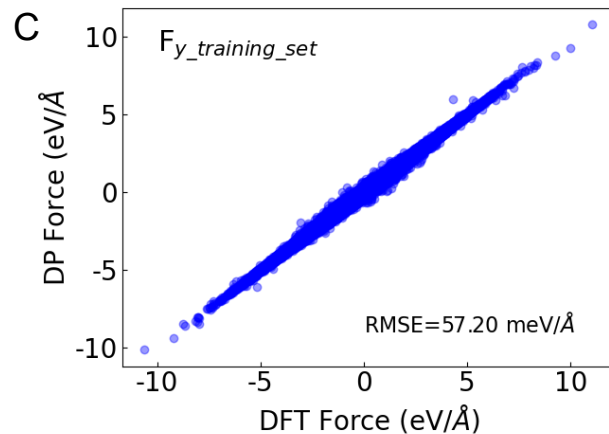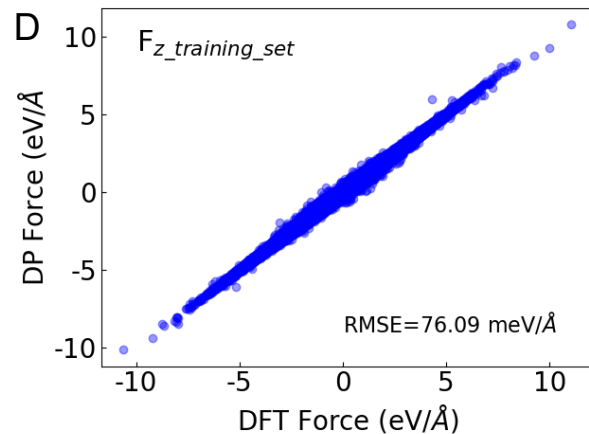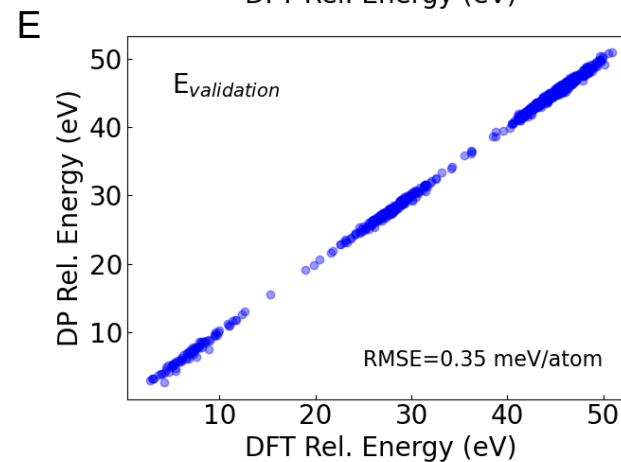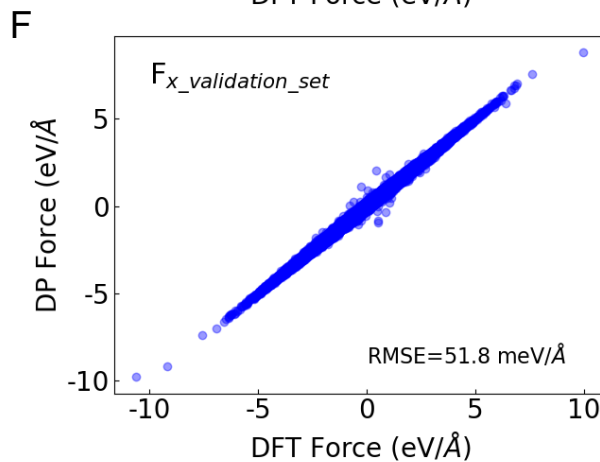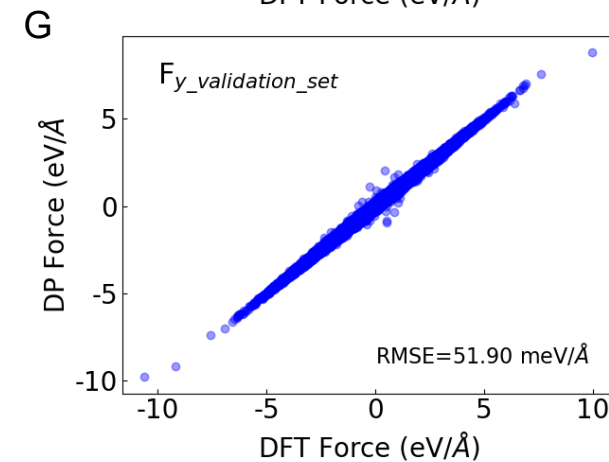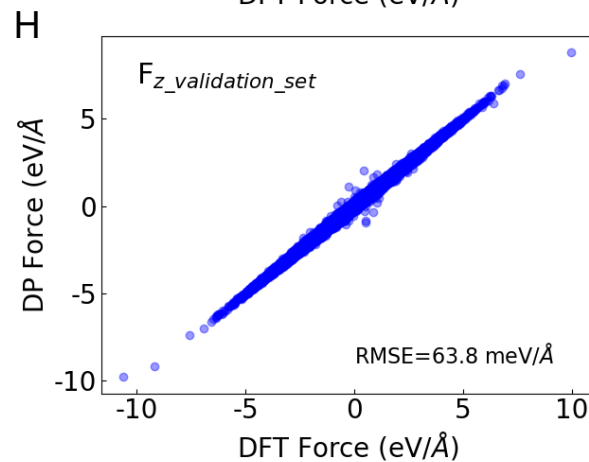

Supplement: d4sc06967f8.pdf [file d4sc06967f8.pdf]

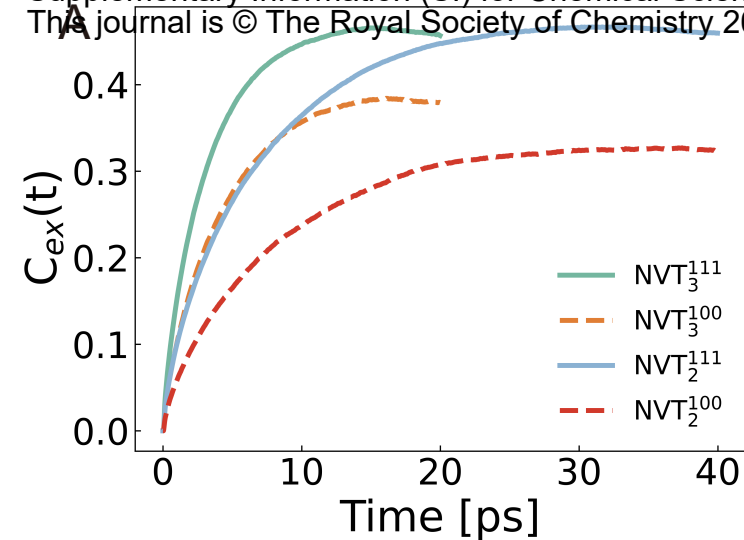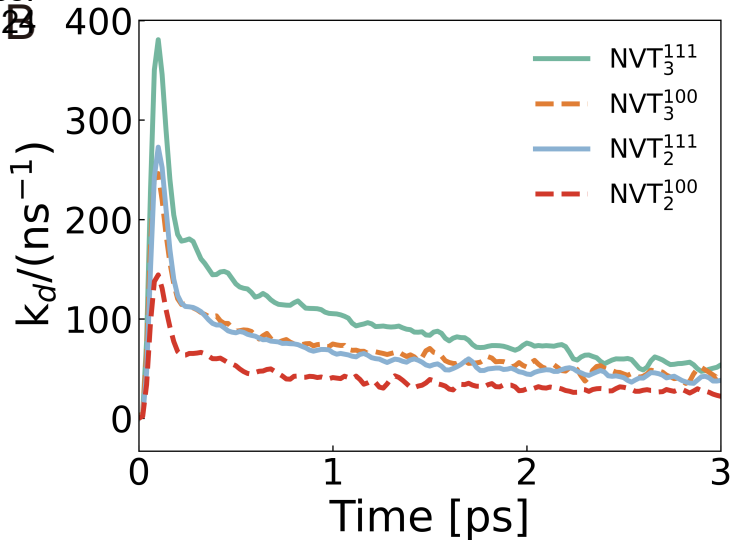

Supplement: d4sc06967f9.pdf [file d4sc06967f9.pdf]
